# Supplementary material for: Perturbing proteomes at single residue resolution using base editing
Source: PubMed Central journal article supplement (PMC7170841; doi:10.1038/s41467-020-15796-7), 2020-04-20
Supplement: 41467_2020_15796_MOESM5_ESM.pdf [file 41467_2020_15796_MOESM5_ESM.pdf]

**Title:** Supplementary Dataset 1

**Description:** gRNA sequences targets, predicted outcomes, scores, and other relevant annotations.

**Title:** Supplementary Dataset 2

**Description:** Supplementary Table 7 (Oligonucleotides used in this study)

**Title:** Supplementary Dataset 3

**Description:** Supplementary 8 (Media recipes used in this study).
